# Supplementary material
Source: publisher figshare collection journal article supplement (https://karger.figshare.com/ndownloader/files/15142769)
Supplement: Supplementary file 1 [file 15142769]

**Supplemental Fig. 1.** Weighted prevalence of thyroid function status by body weight change: (A) male (B) female.
